# Supplementary material for: Impact of porous nanomaterials on inhibiting protein aggregation behaviour
Source: Royal Society of Chemistry journal article supplement (doi:10.1039/d0ra10927d), 2021-01-01
Supplement: d0ra10927d1.pdf [file d0ra10927d1.pdf]

## Electronic Supporting Information

### **Impact of Porous Nanomaterials on Inhibiting the Protein Aggregation Behaviour**

Munmun Bardhan,<sup>a,e,\*</sup> Sandip Dolui,<sup>b</sup> Siddhi Choudhuri,<sup>c</sup> Uttam Paul,<sup>a</sup> Gaurav Bhattacharjee,<sup>d</sup> Manorama Ghosal<sup>a</sup>, Nakul C Maiti,<sup>c</sup> Debashis Mukhopadhyay,<sup>c</sup> Dulal Senapati<sup>a,\*</sup>

<sup>a</sup>Chemical Sciences Division, Saha Institute of Nuclear Physics, HBNI, 1/AF Bidhannagar, Kolkata 700064, INDIA.

<sup>b</sup>Indian Institute of Chemical Biology, Jadavpur, Kolkata-700032, India.

<sup>c</sup>Biophysics and Structural Genomics Division, Saha Institute of Nuclear Physics, HBNI, 1/AF Bidhannagar, Kolkata 700064, INDIA.

<sup>d</sup>Surface Physics Division, Saha Institute of Nuclear Physics, HBNI, 1/AF Bidhannagar, Kolkata 700064, INDIA.

<sup>e</sup>Current address: Department of Physics, Jadavpur University, Kolkata-700032.

Corresponding author's email: [dulal.senapati@saha.ac.in](mailto:dulal.senapati@saha.ac.in), [bardhanm@gmail.com](mailto:bardhanm@gmail.com)

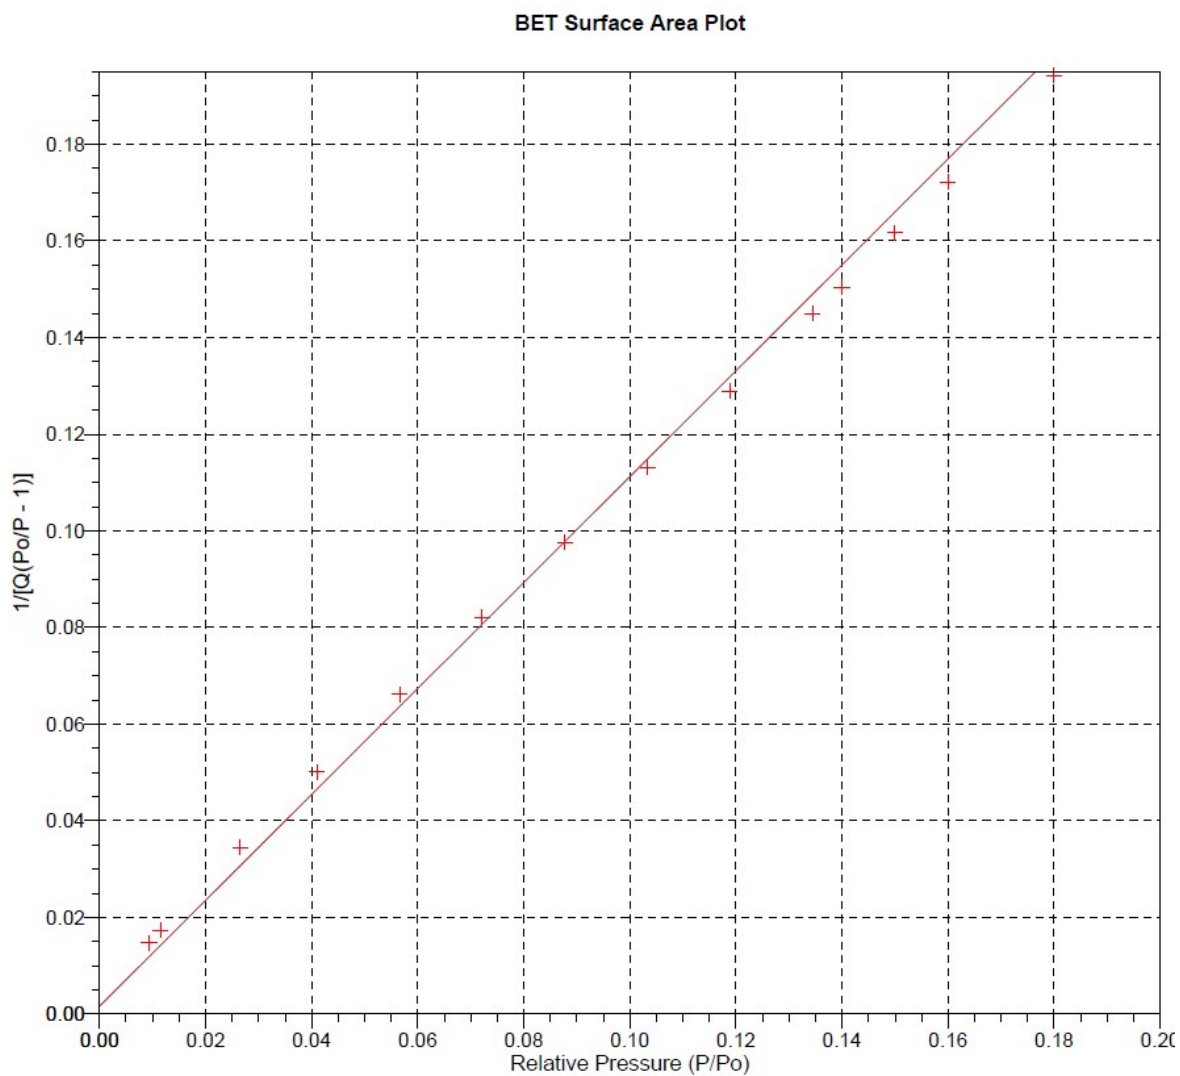

**Figure S1:** BET surface area plot for mesoporous silica nanoparticles (PNS)

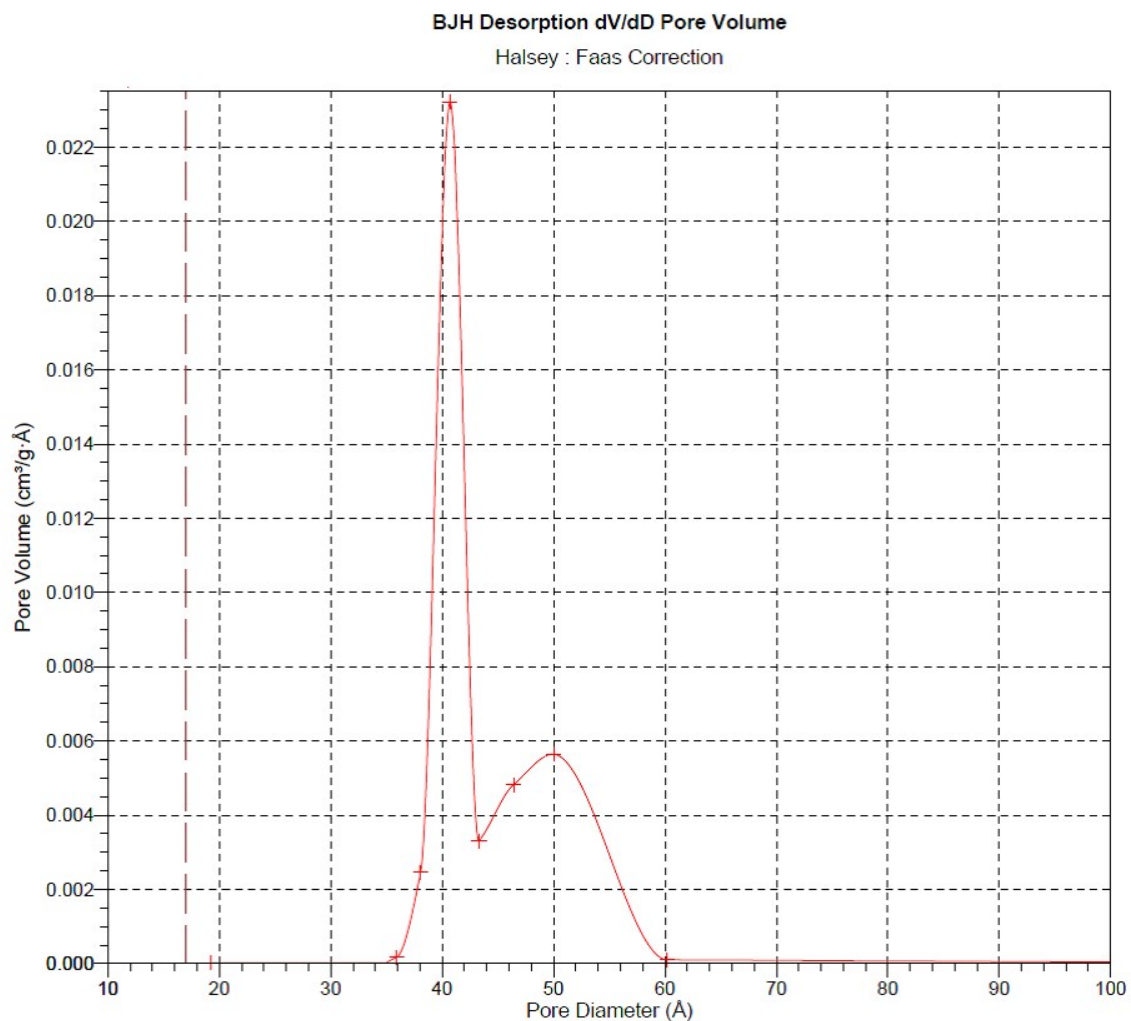

**Figure S2:** BJH desorption plot for mesoporous silica nanoparticles (PNS)

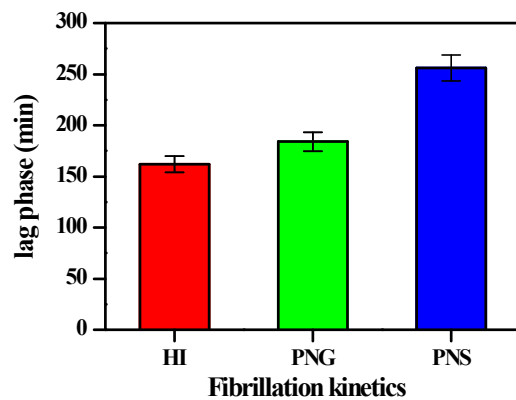

**Figure S3:** Bar plot of the lag phase (in minute scale) of insulin fibrillation in the absence and presence of PNG and PNS.
